# Supplementary material
Source: MDPI journal article supplement (https://www.mdpi.com/search?q=molbank-2022-M1409)
Supplement: s001 [file molbank-2022-M1409-s001.pdf]

## Electronic Supplementary Materials

# Synthesis of 1-[1H,1H,2H,2H-perfluooctyl]-3-[2-(Oxiran-2-yl)ethyl]imidazolium 4-[(2-oxiran-2-yl)ethoxy]benzenesulfonate as a new perfluorinated ionic monomer

T. Kui,<sup>a</sup> S. Livi\*<sup>b</sup> and J. Baudoux\*<sup>a</sup>

<sup>a</sup> *Laboratoire de Chimie Moléculaire et Thio-organique, ENSICAEN, Université de Normandie, CNRS, 6 boulevard du Maréchal Juin, 14050 Caen, France.*

<sup>b</sup> *Université de Lyon, CNRS, Université Claude Bernard Lyon 1, INSA Lyon, Université Jean Monnet, UMR 5223, Ingénierie des Matériaux Polymères F-69621 Cédex, France*

jerome.baudoux@ensicaen.fr; sebastien.livi@insa-lyon.fr

|      |                            |        |
|------|----------------------------|--------|
| I.   | NMR spectrum               | (S-2)  |
| II.  | Thermogravimetric analysis | (S-12) |
| III. | IR spectra                 | (S-13) |
| IV.  | Pictures                   | (S-16) |

# I. NMR spectrum

## 1-(3-buten-1-yl)imidazole **1**

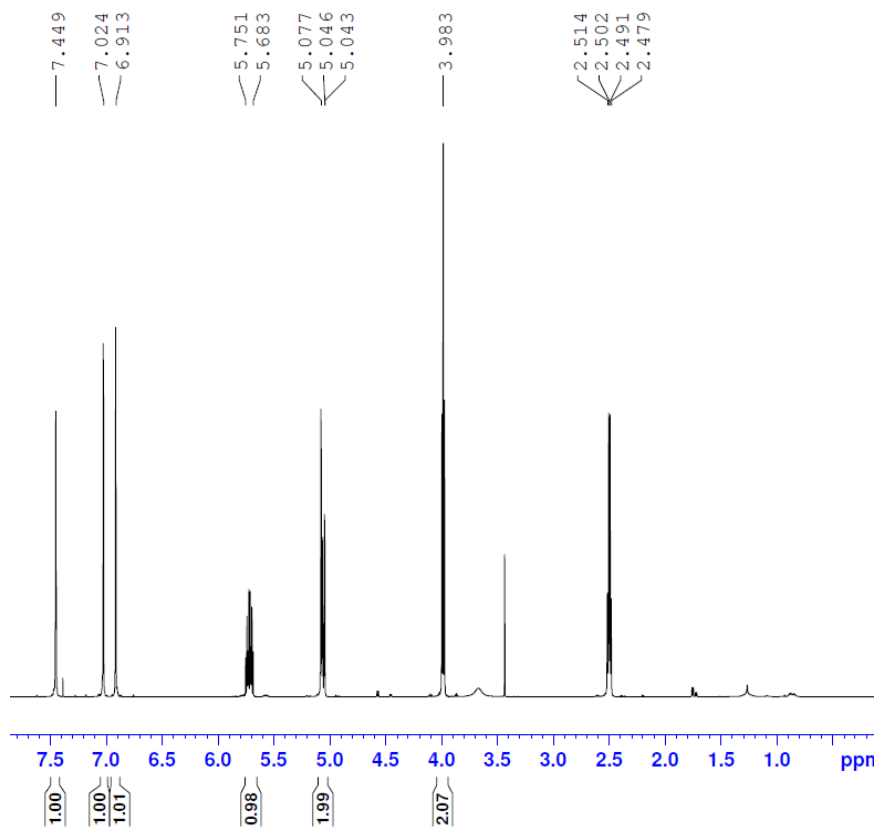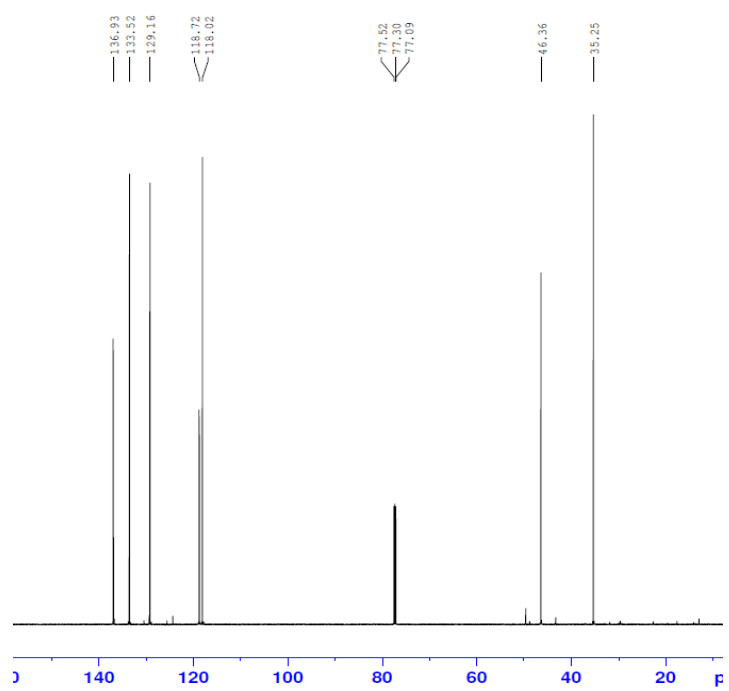

1-[1H,1H,2H,2H-perfluooctyl]-3-(3-buten-1-yl)imidazolium iodide **2**

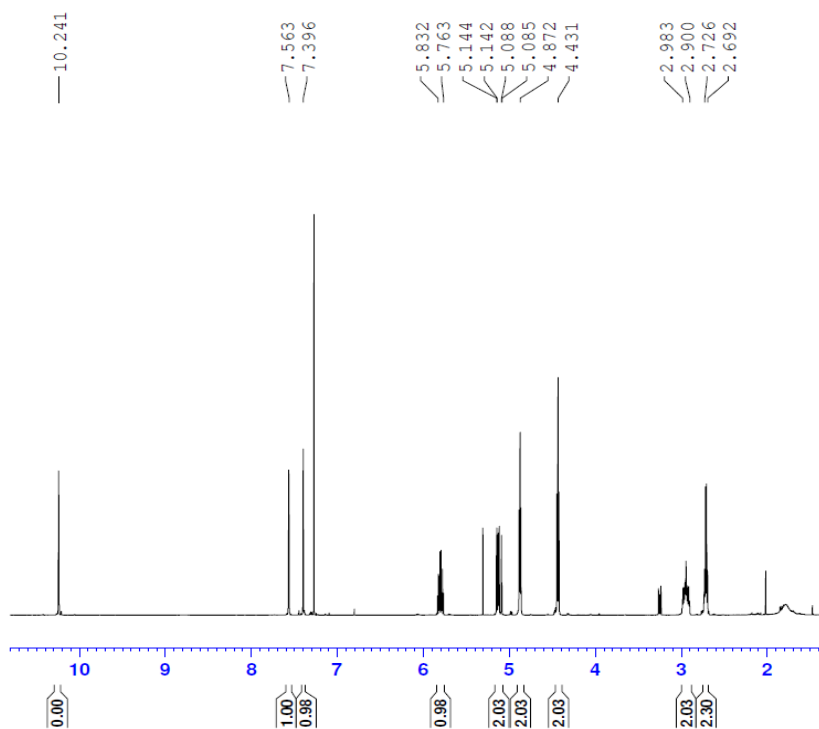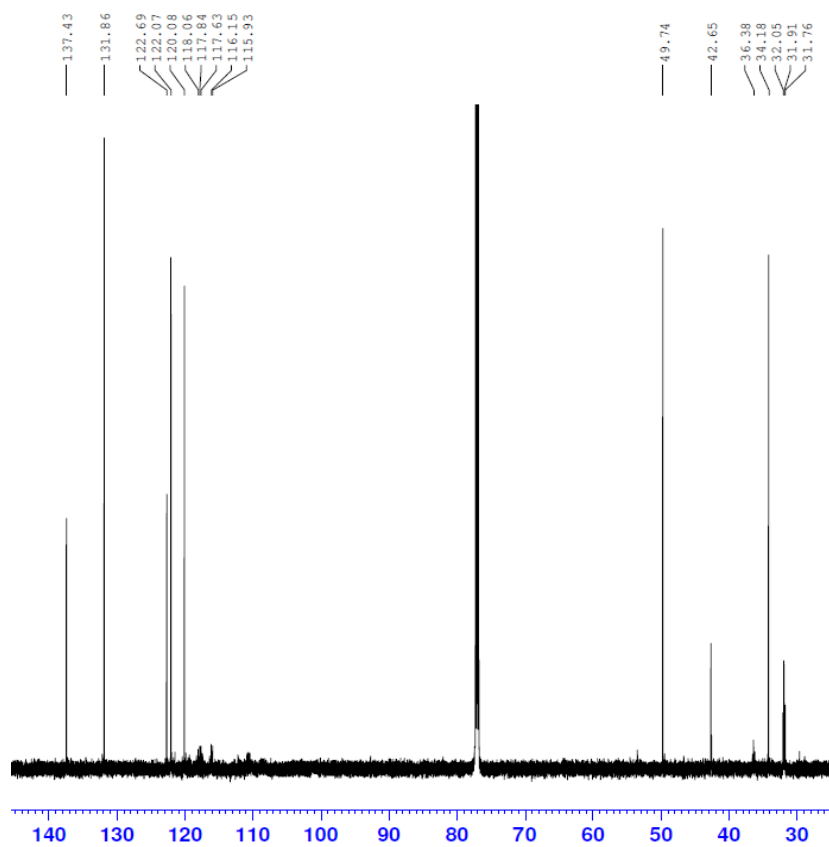

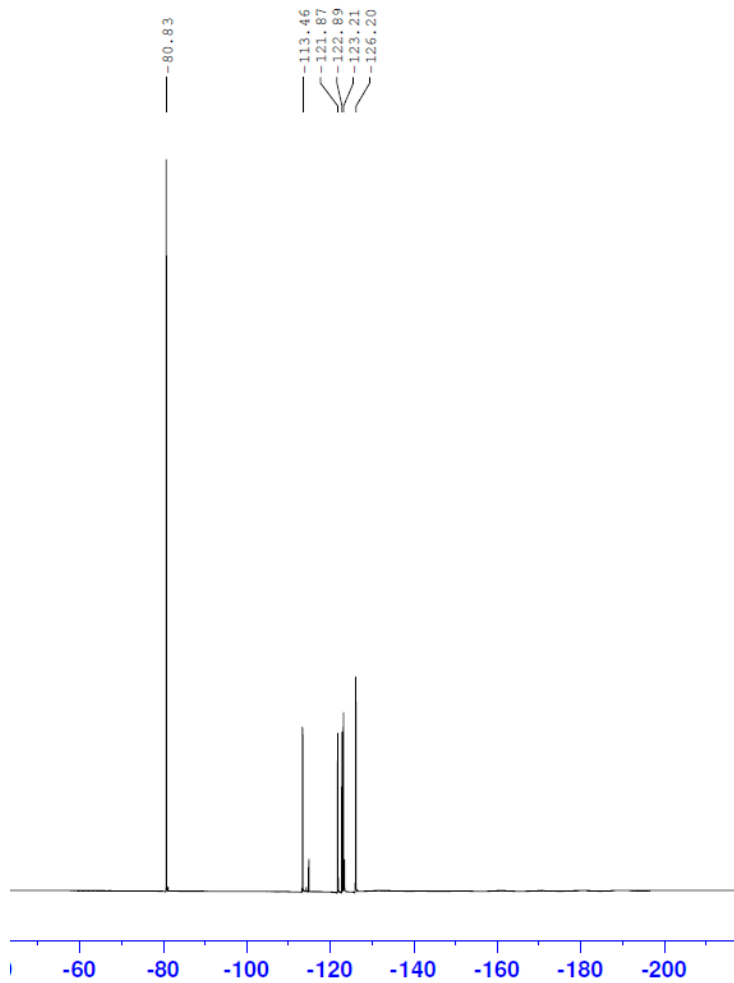

**Sodium 4-(3-buten-1-yloxy)benzenesulfonate 3**

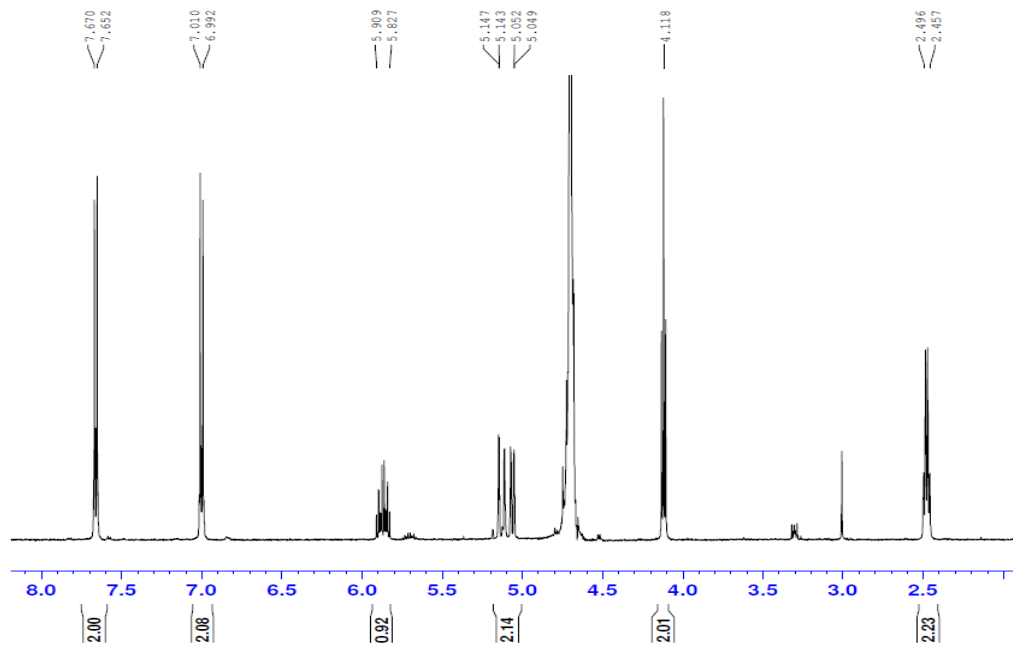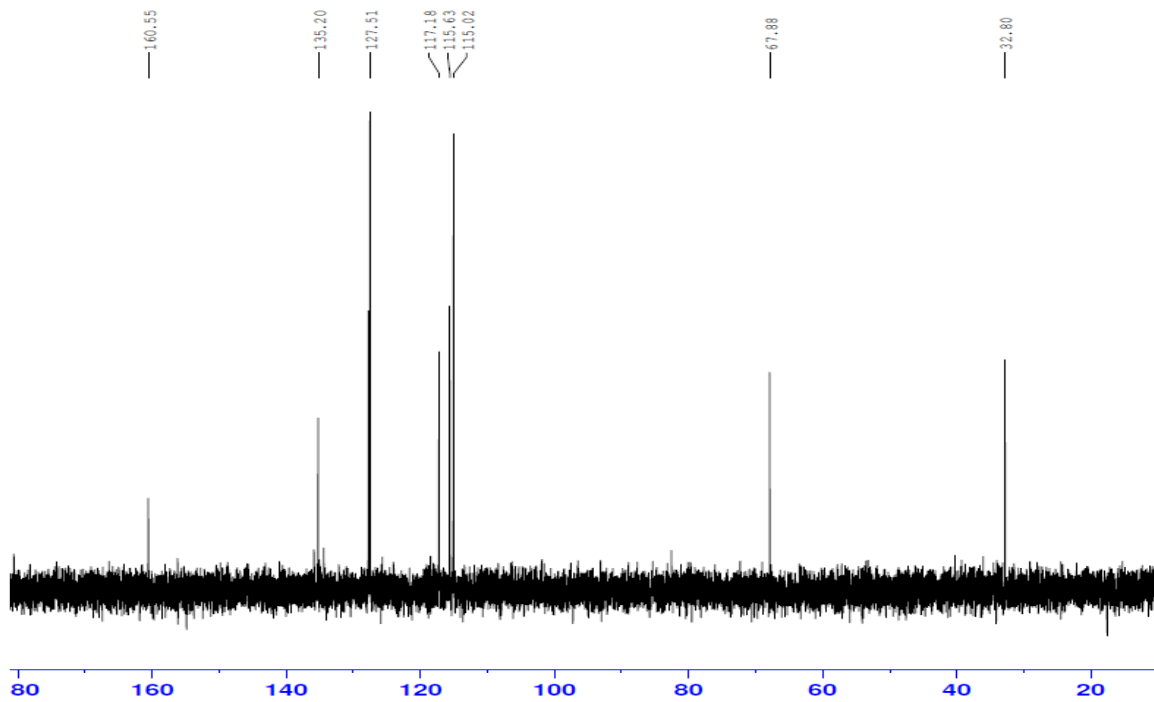

1-[1H,1H,2H,2H-perfluooctyl]-3-(3-buten-1-yl)imidazolium  
 yloxy)benzenesulfonate **4**

4-(3-buten-1-

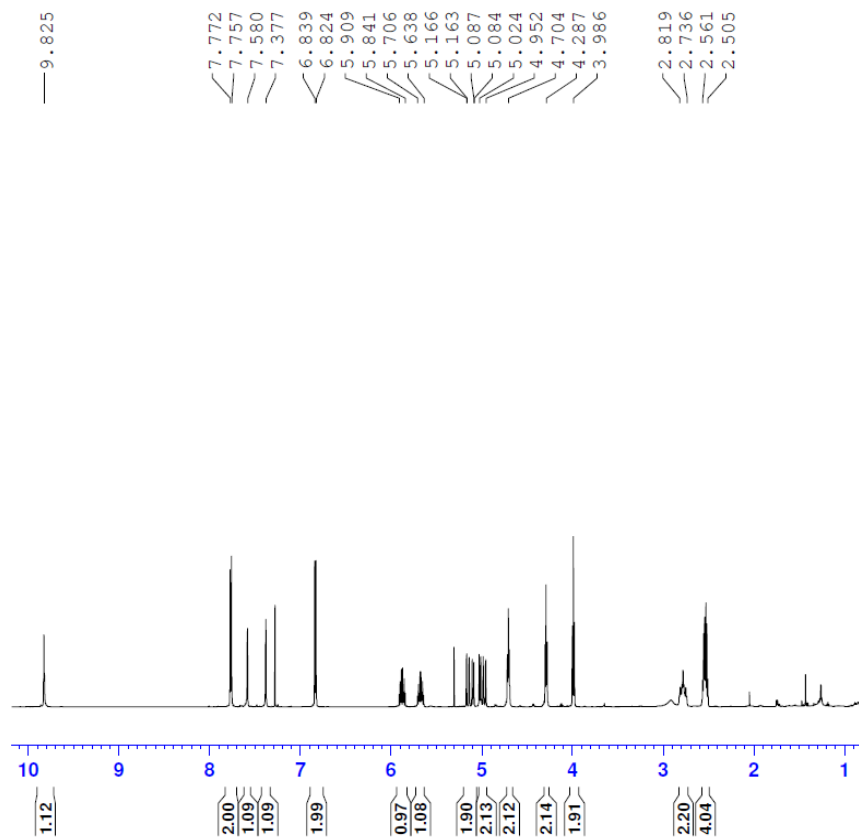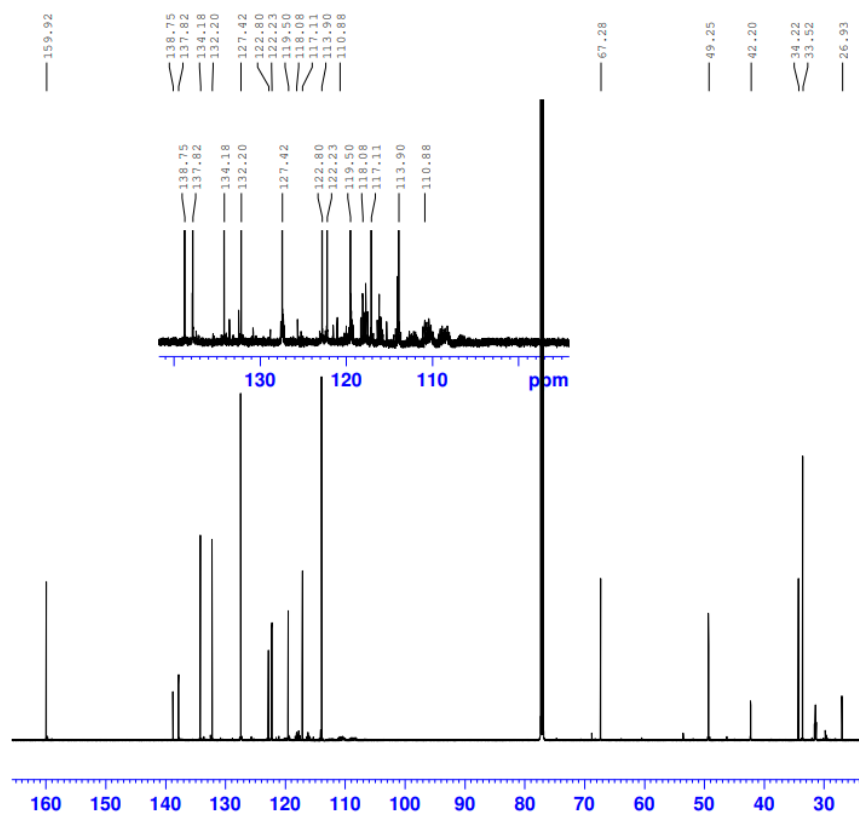

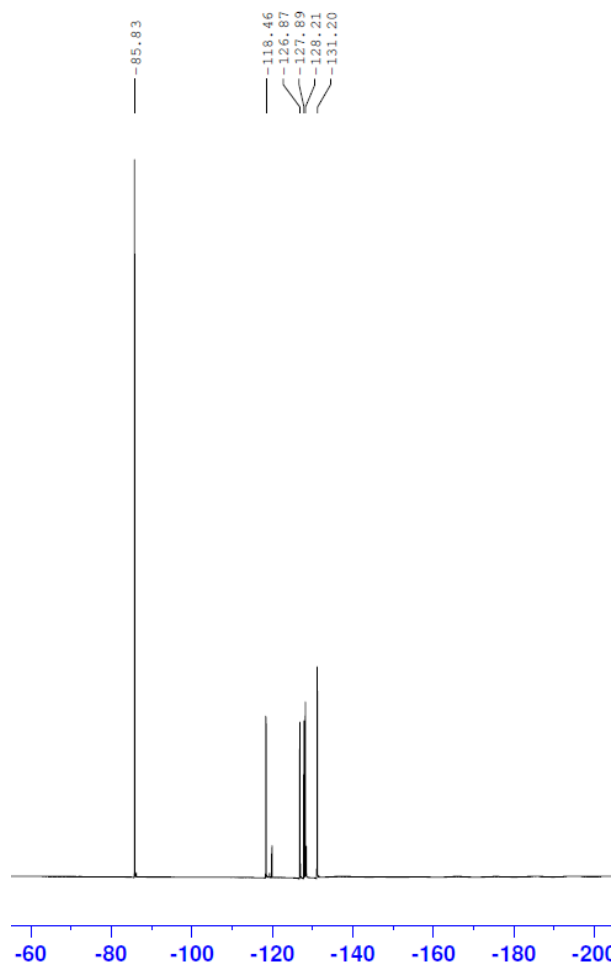

1-[1H,1H,2H,2H-perfluooctyl]-3-[2-(Oxiran-2-yl)ethyl]imidazolium

4-[(2-oxiran-2-yl)ethoxy]benzenesulfonate **5**

<sup>1</sup>H NMR of **5** in CD<sub>2</sub>Cl<sub>2</sub> :

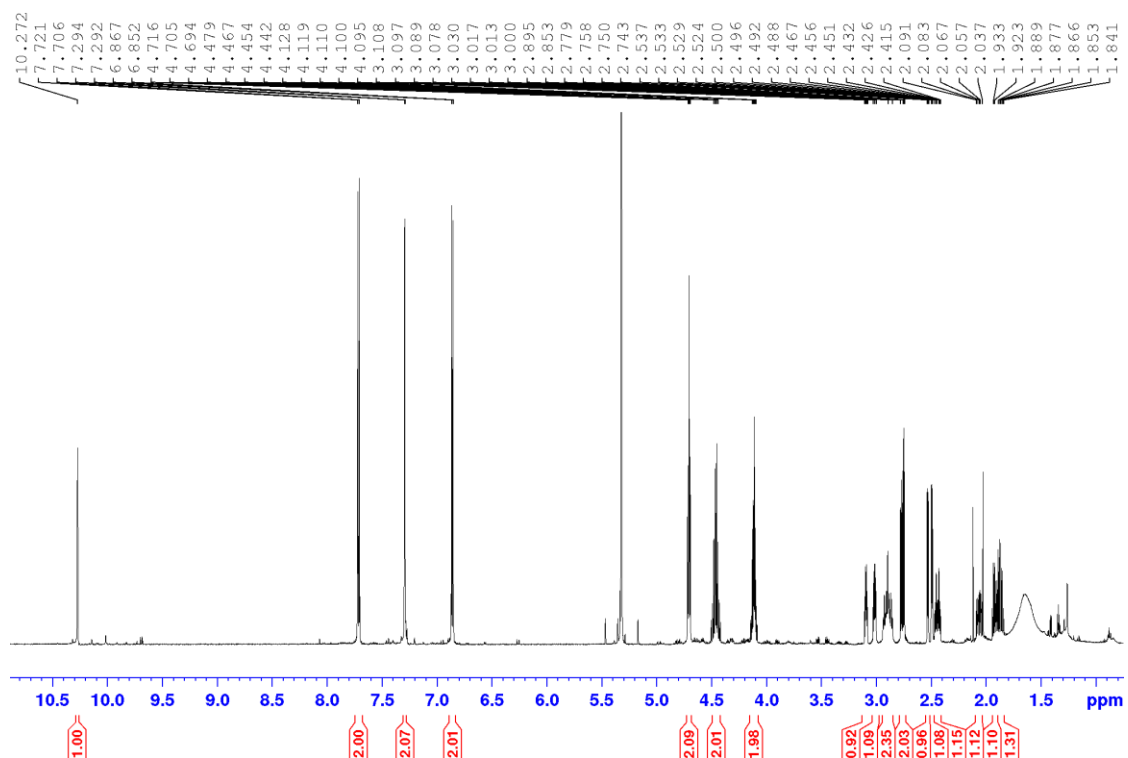

<sup>1</sup>H NMR of **5** in CD<sub>3</sub>CN :

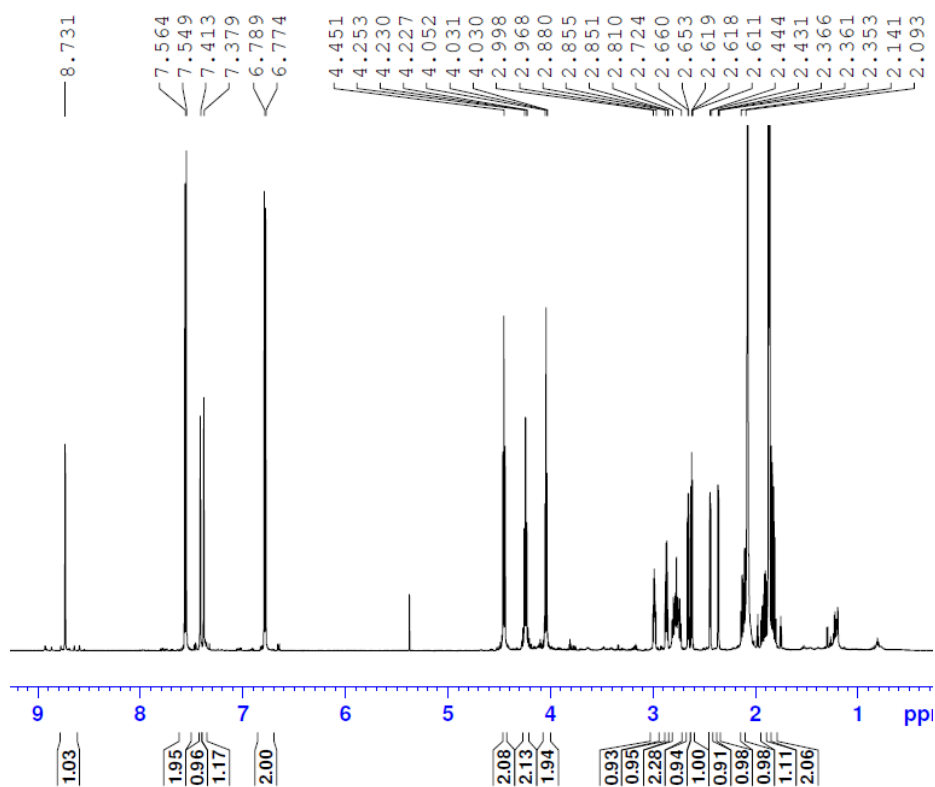



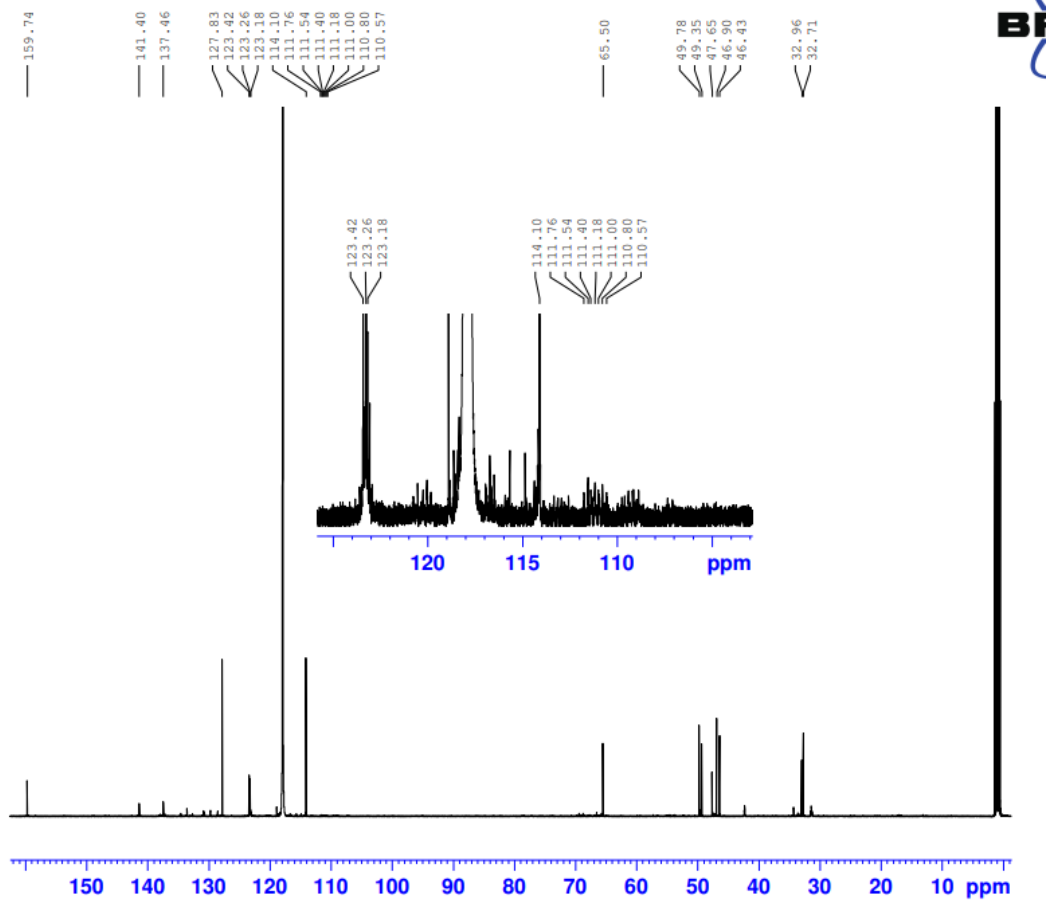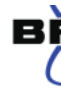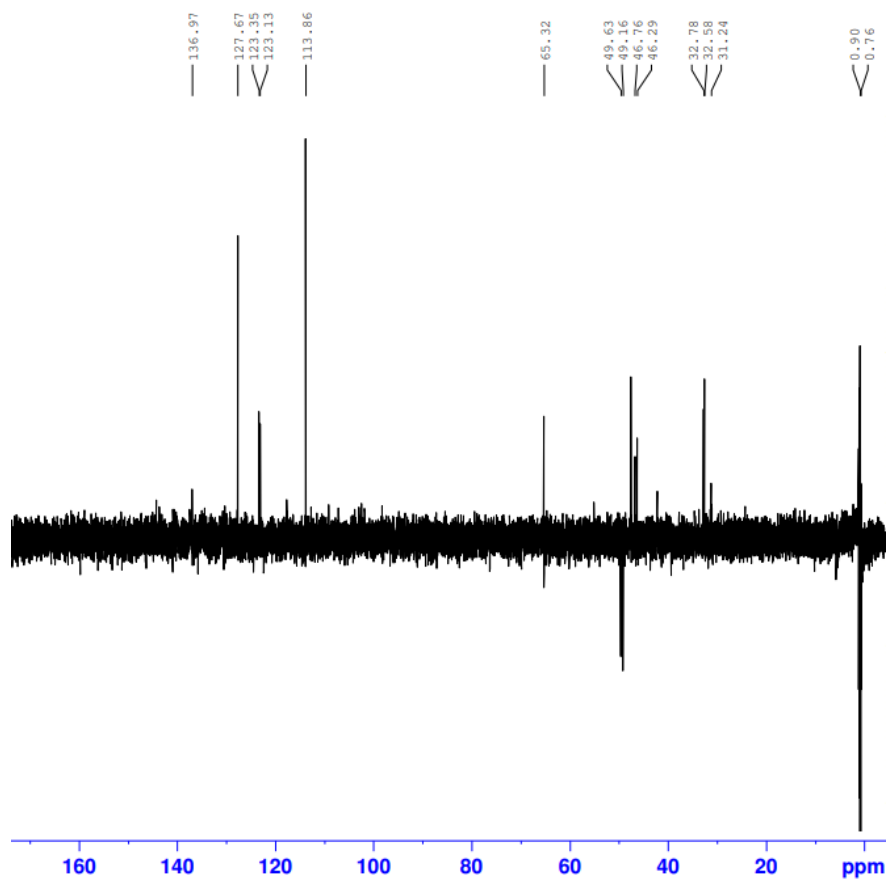

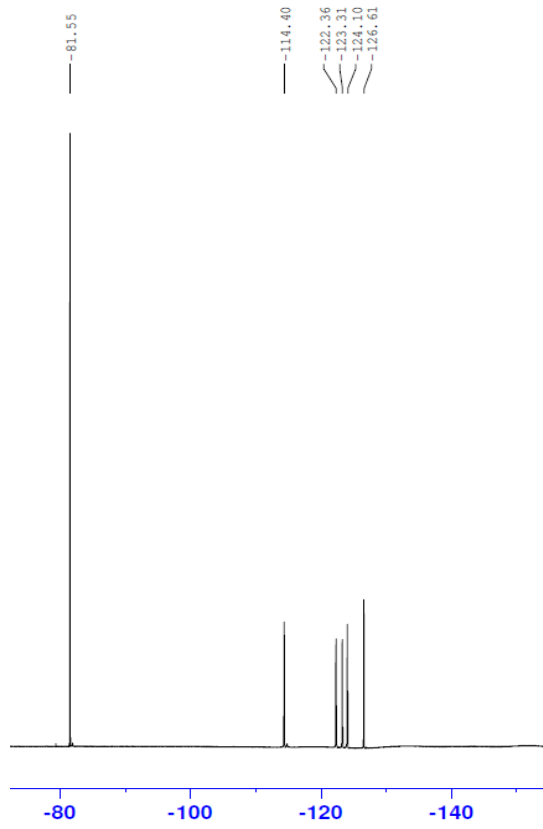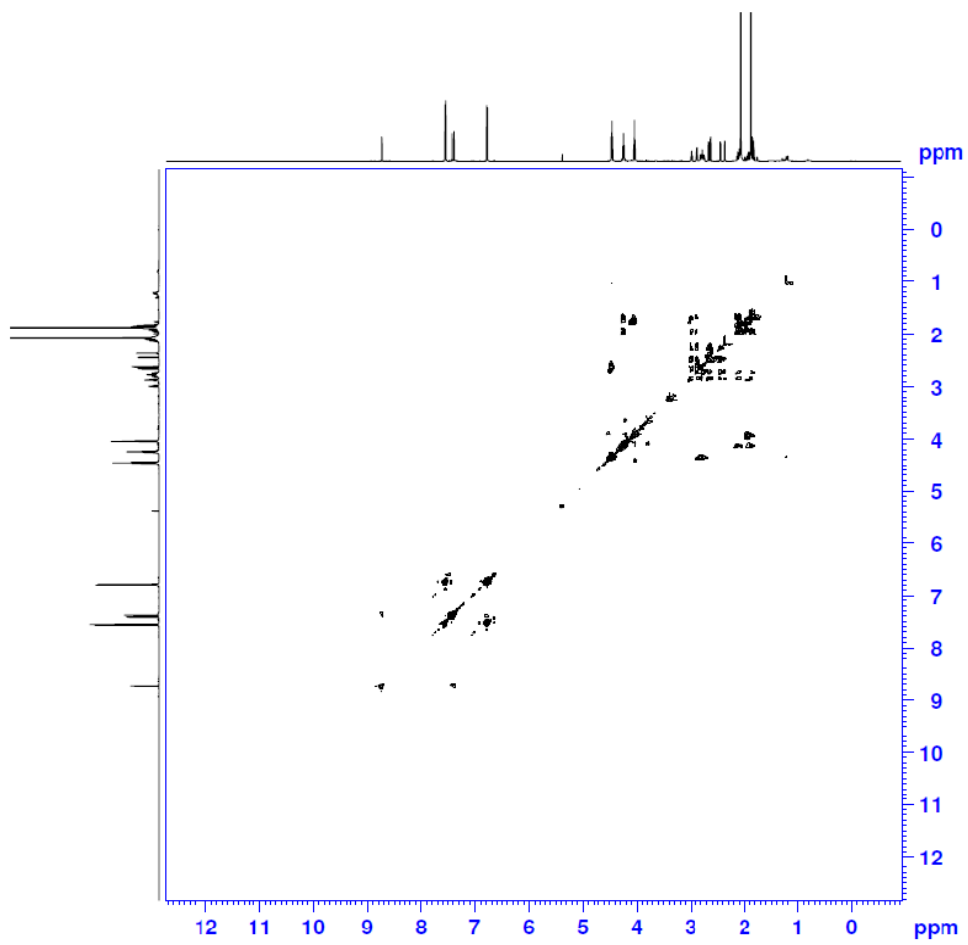

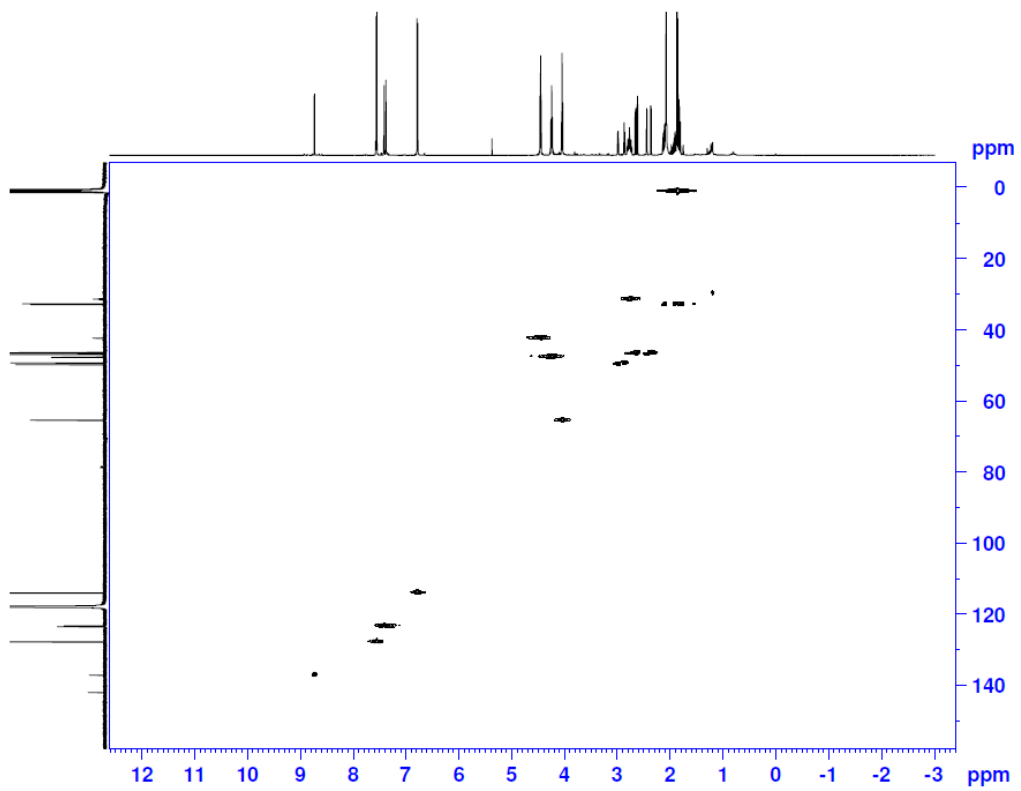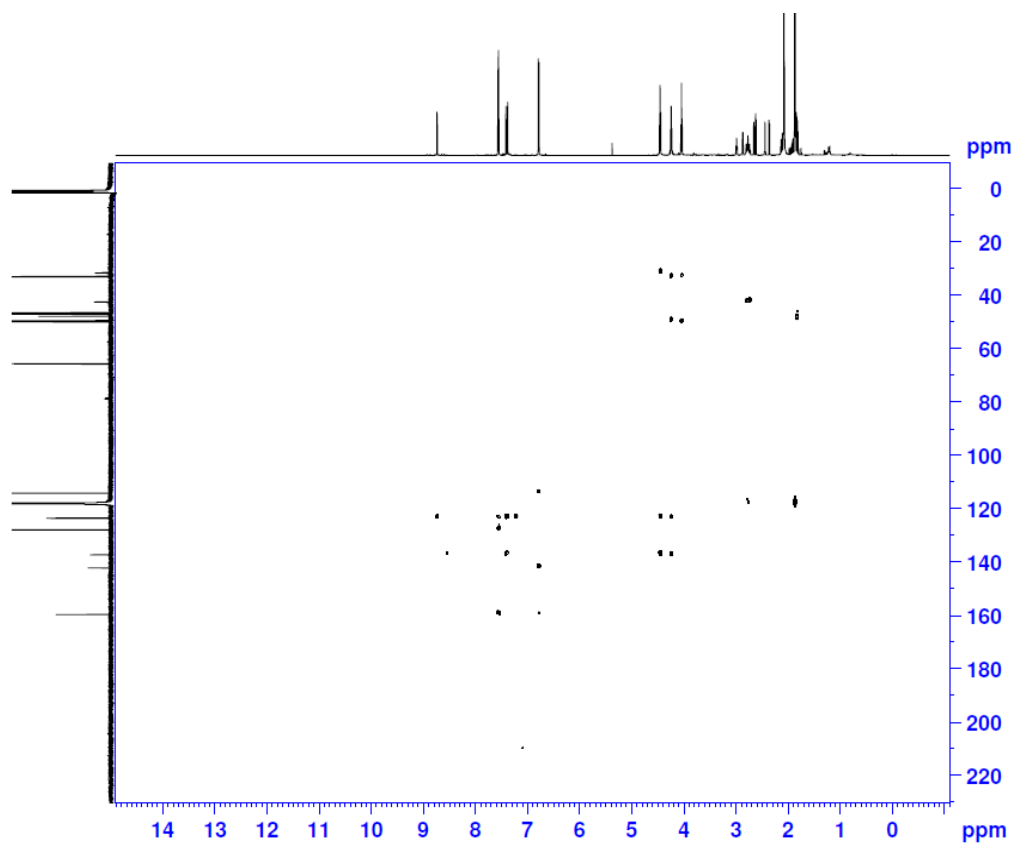

## II. TGA analysis

### TGA and dATG of 5

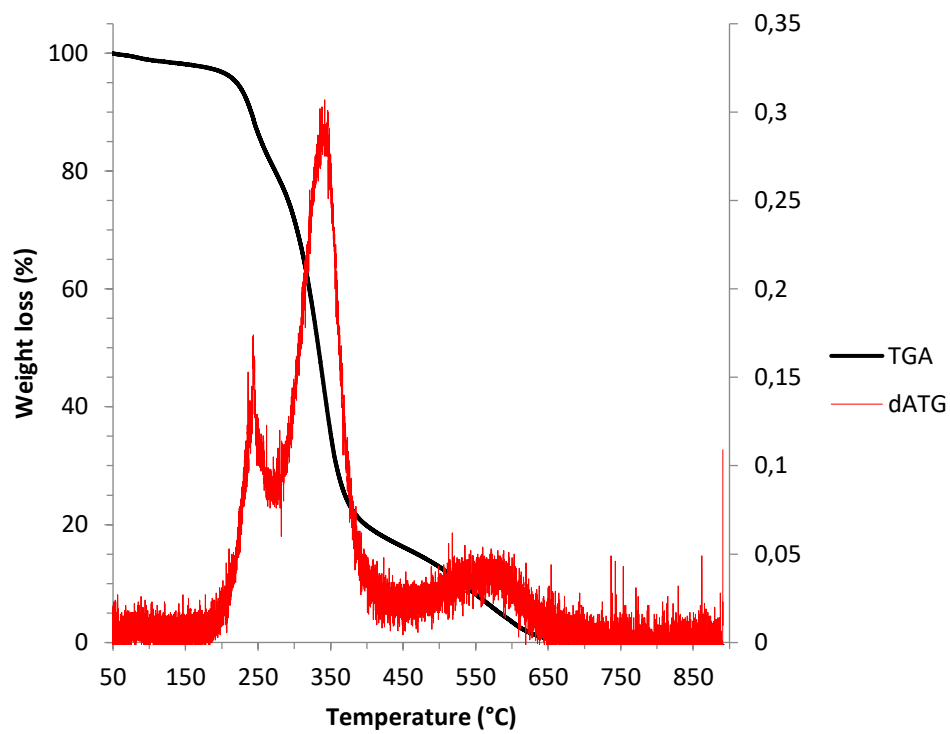

### III. IR spectra

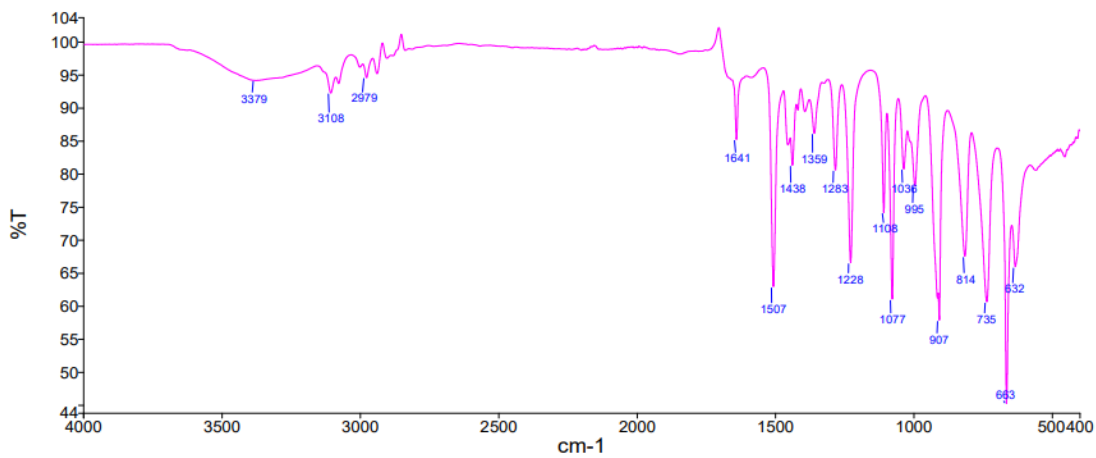

Figure 1: IR spectra of 1

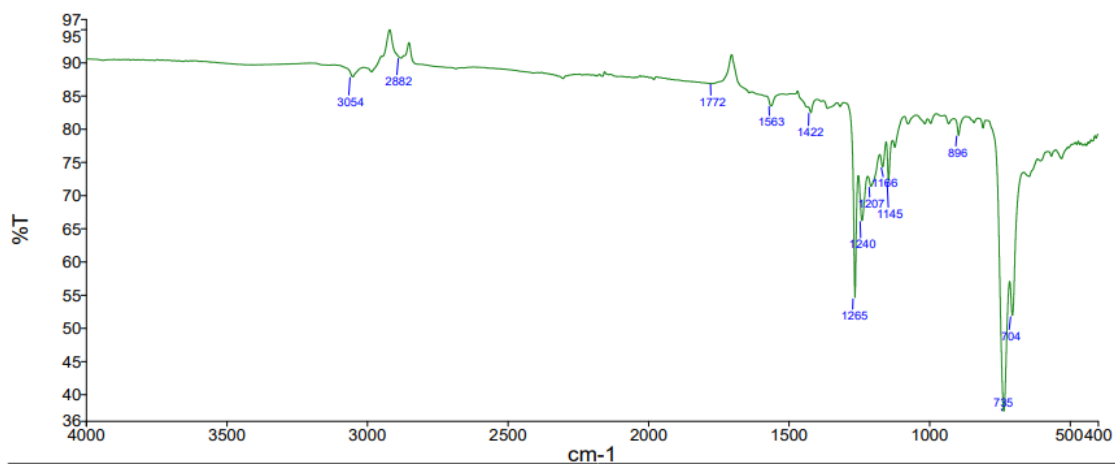

Figure 2: IR spectra of 2

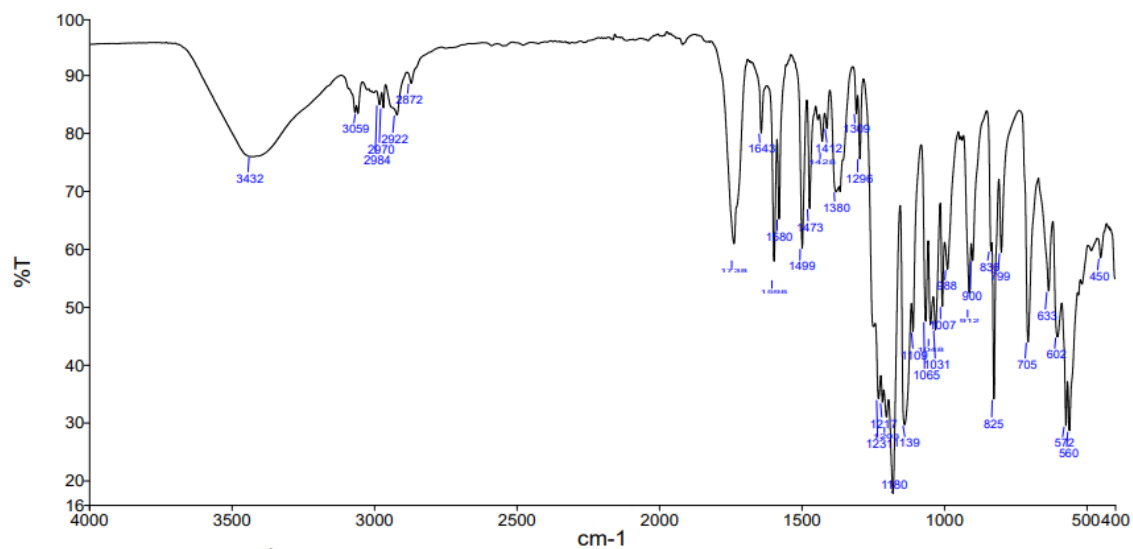

Figure 3: IR spectra of **3**

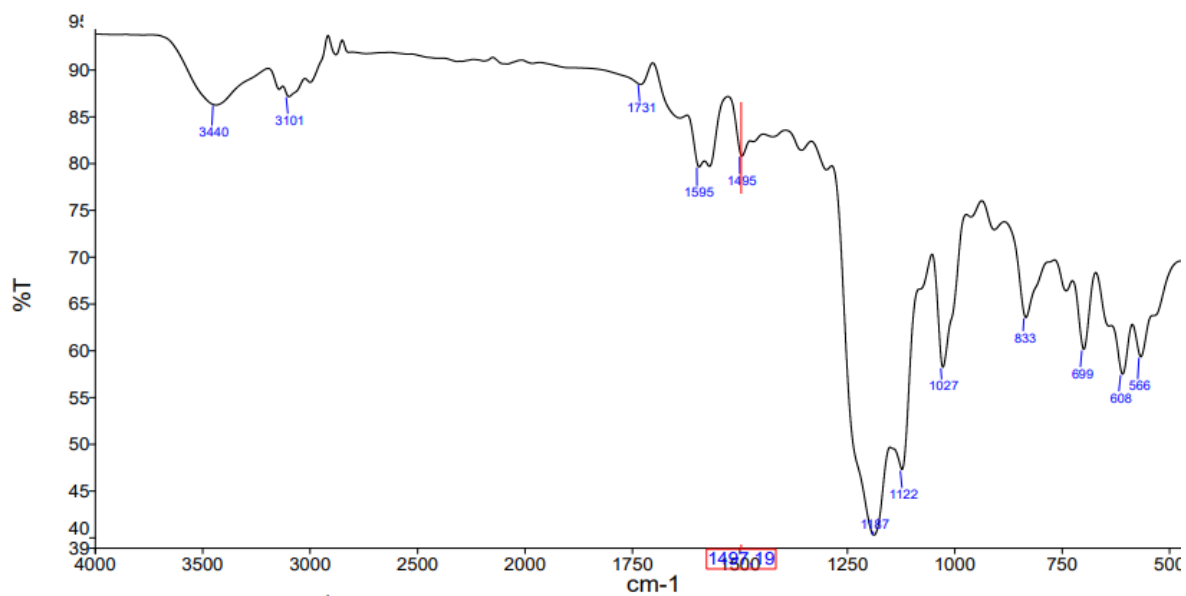

Figure 4: IR spectra of **4**

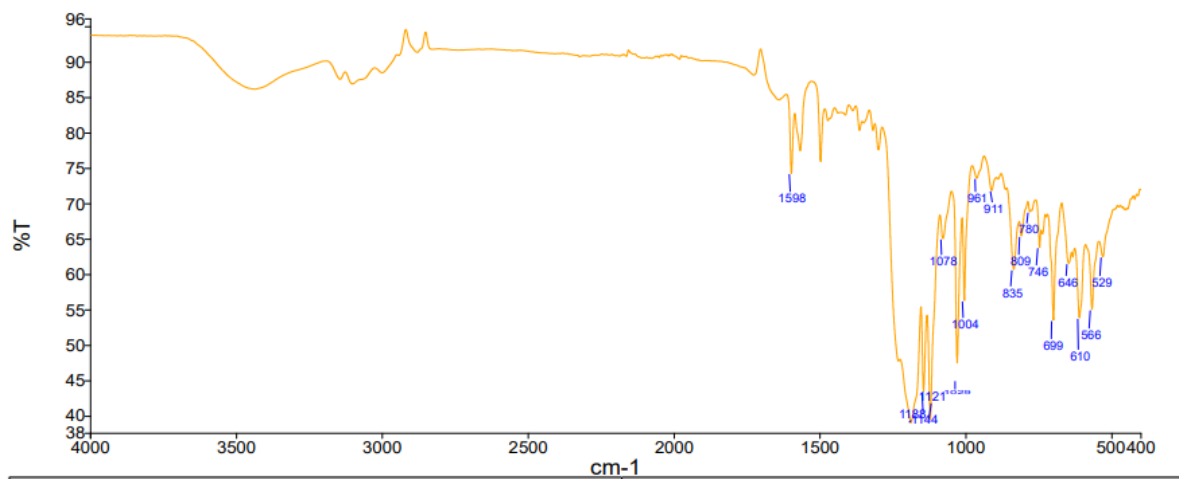

Figure 5: IR spectra of 5

#### IV. Pictures

a)

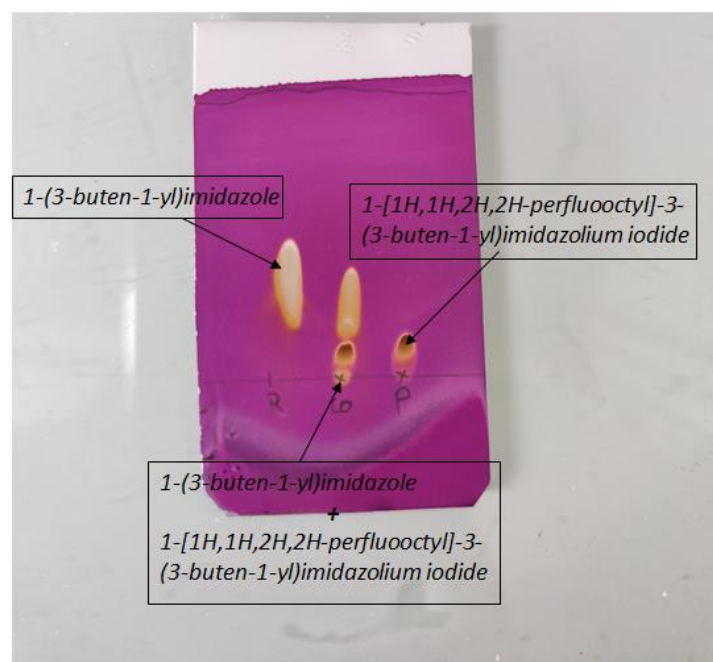

Figure 6: TLC of product **2** ( $\text{CH}_2\text{Cl}_2/\text{MeOH}$  9/1)

b)

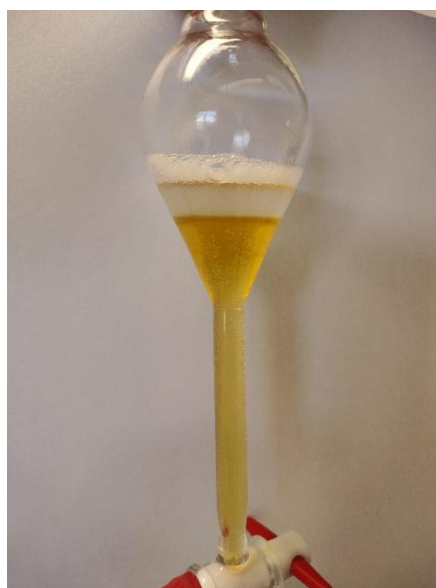

Figure 7: Extraction of product **2** ( $\text{CH}_2\text{Cl}_2/\text{H}_2\text{O}$ )
